# Supplementary material for: Fast, accurate, and lightweight analysis of BS-treated reads with ERNE 2
Source: PubMed Central journal article supplement (PMC4896272; doi:10.1186/s12859-016-0910-3), 2016-03-02
Supplement: 12859_2016_910_MOESM1_ESM.pdf [file 12859_2016_910_MOESM1_ESM.pdf]

# Additional file 1 : implementation usage

Nicola Prezza<sup>1</sup>, Francesco Vezzi<sup>3</sup>, Max Kaller<sup>4</sup>, and Alberto Policriti<sup>1,2</sup>

<sup>1</sup> University of Udine, Department of Mathematics and Informatics, Udine, Italy

<sup>2</sup> Institute of applied genomics, Udine, Italy

<sup>3</sup> Science for Life Laboratory, Department of Biochemistry and Biophysics, Stockholm University, Solna, Sweden

<sup>4</sup> Science for Life Laboratory, KTH Royal Institute of Technology, Stockholm, Sweden

## 1 Implementation usage: ERNE

We implemented our algorithms and data structures in the bisulfite aligner ERNE-BS5 and in the caller ERNE-METH, which are part of the short string alignment package ERNE 2 (<http://erne.sourceforge.net>).

### 1.1 Alignment

Briefly, the implementation needs only two commands to perform alignment of a set of bisulfite-treated reads (in fastq format) against a reference genome:

1. **Index construction:** To build the dB-hash index for bisulfite alignment call:

```
erne-create --methyl-hash --fasta ref.fasta --reference-prefix idx
```

where `ref.fasta` is the input fasta file and `idx` is the prefix of the output index (extension will be automatically added to obtain `idx.ebm`). We recommend to allocate at least  $3.5n$  Bytes of RAM (where  $n$  is the reference length) while building the index. Building the Human genome index requires approximately 4 hours and 9.5GB of RAM on a intel core i7, 2.4GHz machine. After construction, the index will require approximately  $1.2n$  Bytes on disk (and this will also be the RAM required for alignment).

2. **Alignment:** To align a pair of fastq files (containing bisulfite treated reads) to the indexed reference genome, just type

```
erne-bs5 --reference idx.ebm --query1 q1.fq --query2 q2.fq --output ali.bam
```

If reads are not paired, then specify just `--query1` parameter. `erne-bs5` produces output in standard bam format. For more details, please read the manual at <http://erne.sourceforge.net/manual.php>.

### 1.2 Methylation call

**Whole genome BS** After alignment, only one command is needed to perform the methylation call step:

```
erne-meth --fasta ref.fasta --input ali.bam --output-prefix out --annotations-erne --compress gz
```

The output files produced are:

- `out_report.txt` : a detailed human-readable report with the statistics about methylation and alignment.
- `out_report_tabbed.txt` : the same information as above, but in a more succinct and tabbed format (it can be used as input for a script in downstream analysis)
- `out_erne_meth.txt.gz`. A (gzip compressed) table in `erne` format displaying methylation levels for each cytosine in the reference. If methylation annotations in `bismark cov` or in `EPP` format are desired, specify also `--annotations-bismark` or `--annotations-epp`, respectively.

**Target enrichment data** The user can specify a bed file with the option `--target` containing the regions targeted by the protocol used. If this file is specified, `erne-meth` will compute additional statistics useful to assess the precision of the protocol. The following files are produced:

- `out_on_target.txt` : a table containing the percentage of on-target positions having coverage at least  $Ax$ , where  $1 \leq A \leq 100$
- `out_off_target.txt` : a table containing the absolute number of out-of-target positions having coverage at least  $Ax$ , where  $1 \leq A \leq 100$
- `out_out_target_cov_distribution.txt` : a table containing a set of triples  $\langle D, C, N \rangle$ . Each triple has the following meaning: there are  $N$  out-of-target positions having coverage  $C$  and such that the nearest target region is at distance  $D$ .

One common effect in target enrichment protocols are the coverage tails at the borders of the target regions. For this reason, it is useful to extend each target region by a number of bases on its extremities. Use the option `-extend-target N` to extend each target region by  $N$  bp on its extremities.

Specify `-on-target-annotations` to print only on-target Cytosines in the files generated with options `-annotations-epp` and `-annotations-bismark`.
